# Supplementary material for: A Questionnaire-Based Cross-Sectional Survey of Knowledge, Attitudes, and Practices toward COVID-19 among Students and Staff in Asir, Saudi Arabia during the Second Wave of the Pandemic
Source: MDPI journal article supplement (doi:10.3390/vaccines10122014), 2022-11-25
Supplement: s1 [file s1]

Supplementary Table S1: Survey Statistics

|                                           | Knowledge (Total score =13) |                                                      | Attitude (Total score=8) |                                                       | Practice (Total score=9) |                                                       |
|-------------------------------------------|-----------------------------|------------------------------------------------------|--------------------------|-------------------------------------------------------|--------------------------|-------------------------------------------------------|
| Demographics                              | P value*                    | Direction of association                             | P value                  | Direction of association                              | P value                  | Direction of association                              |
| Age group**                               | 0.000                       |                                                      | 0.000                    |                                                       | 0.000                    |                                                       |
| Median<br>(knowledge, attitude, practice) | 0.000                       | Under 18 years old is lower than 20 - < 30 years old | 0.000                    | 20 - < 30 years old is lower than 30 - < 40 years old | 0.000                    | Under 18 years old is lower than 30 - < 40 years old  |
|                                           | 0.000                       | Under 18 years old is lower than 50 - 60 years old   | 0.000                    | 20 - < 30 years old is lower than 40 - < 50 years old | 0.000                    | Under 18 years old is lower than 40 - < 50 years old  |
|                                           | 0.000                       | Under 18 years old is lower than 30 - < 40 years old | 0.017                    | under 18 years old is lower than 30 - < 40 years old  | 0.000                    | Under 18 years old is lower than 50 - 60 years old    |
|                                           | 0.000                       | Under 18 years old is lower than 40 - < 50 years old | 0.009                    | under 18 years old is lower than 40 - < 50 years old  | 0.000                    | 20 - < 30 years old is lower than 30 - < 40 years old |
|                                           |                             |                                                      |                          |                                                       | 0.000                    | 20 - < 30 years old is lower than 40 - < 50 years old |
|                                           |                             |                                                      |                          |                                                       | 0.000                    | 20 - < 30 years old is lower than 50 - 60 years old   |
| Gender                                    | 0.934                       |                                                      | 0.000                    | Female is higher than male                            | 0.000                    | Female is higher than male                            |
| Employment Status                         | 0.000                       |                                                      | 0.000                    |                                                       | 0.000                    |                                                       |
|                                           | 0.000                       | Student is lower than Teaching Staff                 | 0.000                    | Student is lower than Teaching Staff                  | 0.000                    | Student is lower than Teaching Staff                  |
|                                           | 0.000                       | Student is lower than Administrative Staff           | 0.000                    | Student is lower than Administrative Staff            | 0.000                    | Student is lower than Administrative Staff            |
| Place of residence                        | 0.000                       | Urban is higher than rural areas                     | 0.924                    |                                                       | 0.677                    |                                                       |
| Level of education***                     | 0.000                       |                                                      | 0.000                    |                                                       | 0.069                    |                                                       |
|                                           | 0.000                       | Bachelor is lower than PhD                           | 0.001                    | Master is lower than Bachelor                         |                          |                                                       |
|                                           | 0.000                       | Master is lower than PhD                             |                          |                                                       |                          |                                                       |
| Have you ever attended COVID-             | 0.000                       | Yes is higher than no                                | 0.599                    |                                                       | 0.06                     |                                                       |

|                                                                      |       |                       |       |                       |       |                       |
|----------------------------------------------------------------------|-------|-----------------------|-------|-----------------------|-------|-----------------------|
| <b>19 infection training or orientation session? (yes)</b>           |       |                       |       |                       |       |                       |
| <b>Have you been infected with COVID-19?(yes)</b>                    | 0.000 | Yes is higher than no | 0.000 | No is higher than yes | 0.002 | No is higher than yes |
| <b>Has any of your colleagues been infected with COVID-19? (yes)</b> | 0.000 | Yes is higher than no | 0.785 |                       | 0.808 |                       |

\*Significance for comparison performed by the Mann-Whitney U test (to compare 2 groups) or the Kruskal-Wallis test (to compare >2 groups). This is adjusted p-value after Bonferroni correction.

\*\*In post hoc analysis (in Kruskal-Wallis test), only the significant findings were presented.

\*\*\*those who answers this question with “other” have been excluded
